# Supplementary material for: Engineering Gain-of-Function Analogues of the Spider Venom Peptide HNTX-I, A Potent Blocker of the hNaV1.7 Sodium Channel
Source: PubMed Central journal article supplement (PMC6162447; doi:10.3390/toxins10090358), 2018-09-04
Supplement: toxins-10-00358-s001.pdf [file toxins-10-00358-s001.pdf]

# Supplementary Materials: Engineering Gain-of-Function Analogues of the Spider Venom Peptide HNTX-I, A Potent Blocker of the hNav1.7 Sodium Channel

Yunxiao Zhang, Qiuchu Yang, Qingfeng Zhang, Dezheng Peng, Minzhi Chen, Songping Liang, Xi Zhou and Zhonghua Liu

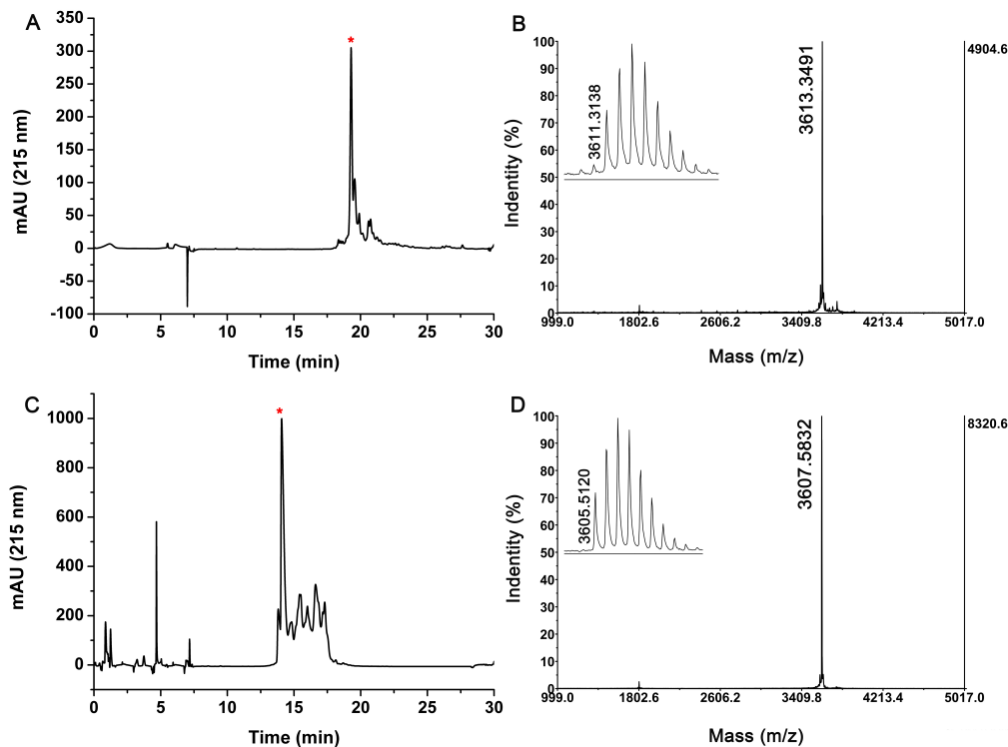

**Figure S1.** Synthesis and oxidative folding of wild type HNTX-I. (A) RP-HPLC purification of crude linear HNTX-I, and asterisk indicated the peak containing HNTX-I linear peptide; (B) MALDI-TOF MS analysis of purified linear HNTX-I; (C) Analytical RP-HPLC purification of crude folded HNTX-I, and asterisk indicated the correctly folded peptide; (D) MALDI-TOF MS analysis of the purified folded HNTX-I, and inset was an enlarged view of the peak.

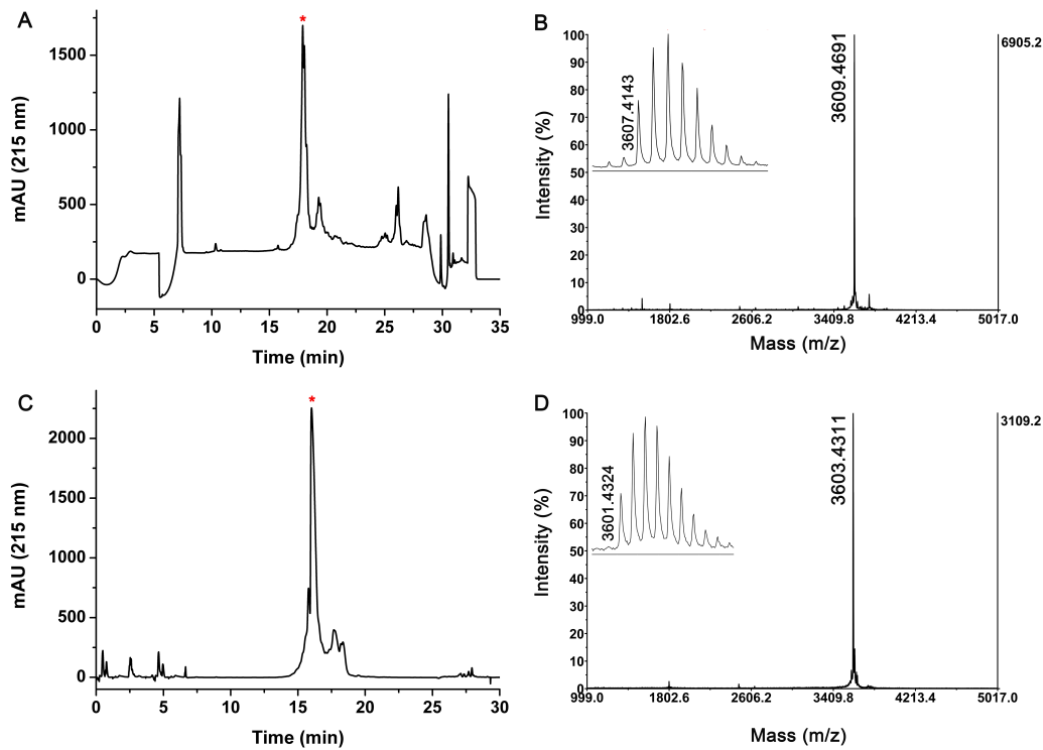

**Figure S2.** Synthesis and oxidative folding of HNTX-I analogue E1G-N23S-D26H-L32W. (A) RP-HPLC purification of crude linear HNTX-I analogue E1G-N23S-D26H-L32W, and asterisk indicated the peak containing E1G-N23S-D26H-L32W linear peptide; (B) MALDI-TOF MS analysis of purified linear E1G-N23S-D26H-L32W; (C) Analytical RP-HPLC purification of crude folded E1G-N23S-D26H-L32W, and asterisk indicated the correctly folded peptide; (D) MALDI-TOF MS analysis of the purified folded HNTX-I, and inset was an enlarged view of the peak.

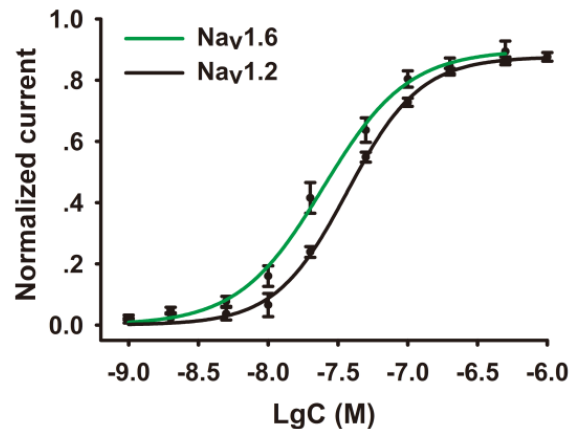

**Figure S3.** Effect of E1G-N23S-D26H-L32W on Nav1.2 and Nav1.6 expressed in HEK 293 cells. Concentration-response curves of E1G-N23S-D26H-L32W at Nav1.2 and Nav1.6 assessed by whole-cell patch-clamp experiments. IC<sub>50</sub> value of E1G-N23S-D26H-L32W on Nav1.2 and Nav1.6 were Data are mean  $\pm$  SEM, with  $n = 3-5$  cells per data point.
